# Supplementary material for: Tetrabutylammonium cations for moisture-resistant and semitransparent perovskite solar cells
Source: Royal Society of Chemistry journal article supplement (doi:10.1039/c7ta06735f), 2017-01-01
Supplement: c7ta06735f1.pdf [file c7ta06735f1.pdf]

## Supporting Information for

# Tetrabutylammonium cations for moisture-resistant and semitransparent perovskite solar cells

Isabella Poli,<sup>§ ‡</sup> Salvador Eslava,<sup>¶ ‡</sup> and Petra Cameron<sup>§ ‡</sup>

<sup>§</sup>Department of Chemistry, University of Bath, Bath BA2 7AY, United Kingdom

<sup>¶</sup>Department of Chemical Engineering, University of Bath, Bath BA2 7AY, United Kingdom

<sup>‡</sup>Centre for Sustainable Chemical Technologies, University of Bath, Bath BA2 7AY, United Kingdom

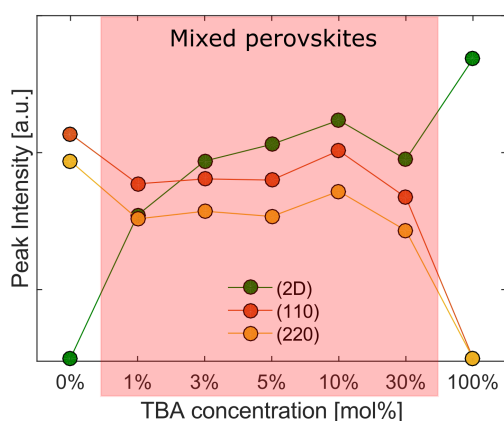

Fig. S1: Intensity of XRD peaks assigned to the 2D phase and 3D phase ([110] and [220]) of  $(\text{TBA})_n(\text{MA})_{1-n}\text{PbX}_3$  films made from perovskite precursor solutions with  $n=0$  (0%),  $n=0.01$  (1%),  $n=0.03$  (3%),  $n=0.5$  (5%),  $n=0.1$  (10%),  $n=0.3$  (30%) and  $n=1$  (100%)

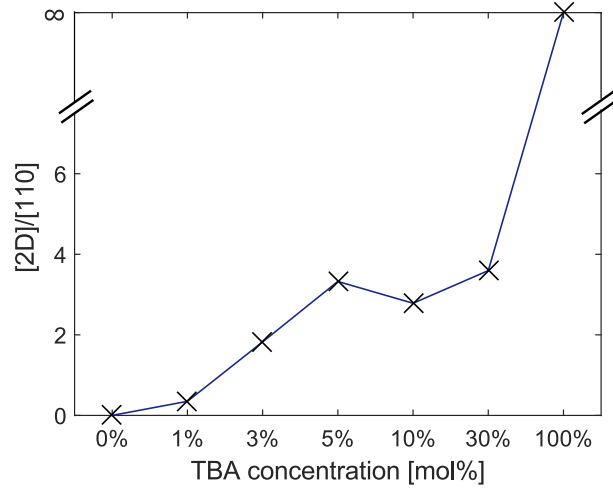

Fig. S2: Ratio between the intensity of XRD peaks assigned to the 2D phase and 3D phase ( $2D/[110]$ ) of  $(TBA)_n(MA)_{1-n}PbX_3$  films made from perovskite precursor solutions with  $n=0$  (0%),  $n=0.01$  (1%),  $n=0.03$  (3%),  $n=0.5$  (5%),  $n=0.1$  (10%),  $n=0.3$  (30%) and  $n=1$  (100%)

Table S1: Position and integrated intensity of XRD peaks assigned to the 2D and 3D ([110] and [220]) perovskite phase. XRD patterns analysed using the MATLAB function PeakFinder

| N0   | [2D]   |        | [110]  |        | [220]  |        | [2D]/[110] |
|------|--------|--------|--------|--------|--------|--------|------------|
|      | Pos[°] | Area   | Pos[°] | Area   | Pos[°] | Area   |            |
| 0%   | 7.9    | 0      | 14.825 | 186.95 | 29.235 | 74.92  | 0          |
| 1%   | 7.9    | 12.26  | 14.772 | 35.073 | 29.189 | 10.786 | 0.35       |
| 3%   | 7.93   | 75.36  | 14.773 | 41.304 | 29.174 | 13.955 | 1.82       |
| 5%   | 7.912  | 132.16 | 14.758 | 39.738 | 29.152 | 11.7   | 3.33       |
| 10%  | 7.89   | 297.34 | 14.679 | 106.8  | 29.153 | 27.311 | 2.78       |
| 30%  | 7.82   | 79.67  | 14.72  | 22.16  | 29.186 | 7.28   | 3.59       |
| 100% | 7.81   | 2337.4 | 14.8   | 0      | 29.2   | 0      | ∞          |

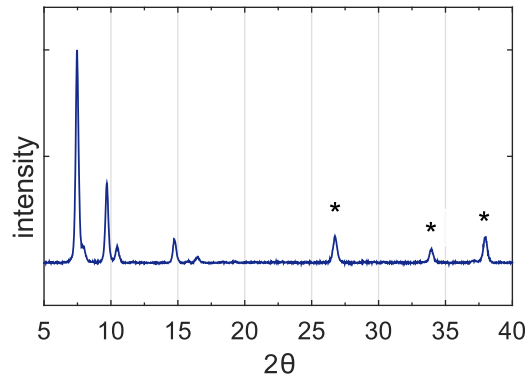

Fig. S3: XRD pattern of perovskite film with 100 % TBAI. Films have been spun onto FTO c-glass substrates. Peaks originated by  $SnO_2$  underlayers are marked by asterisks

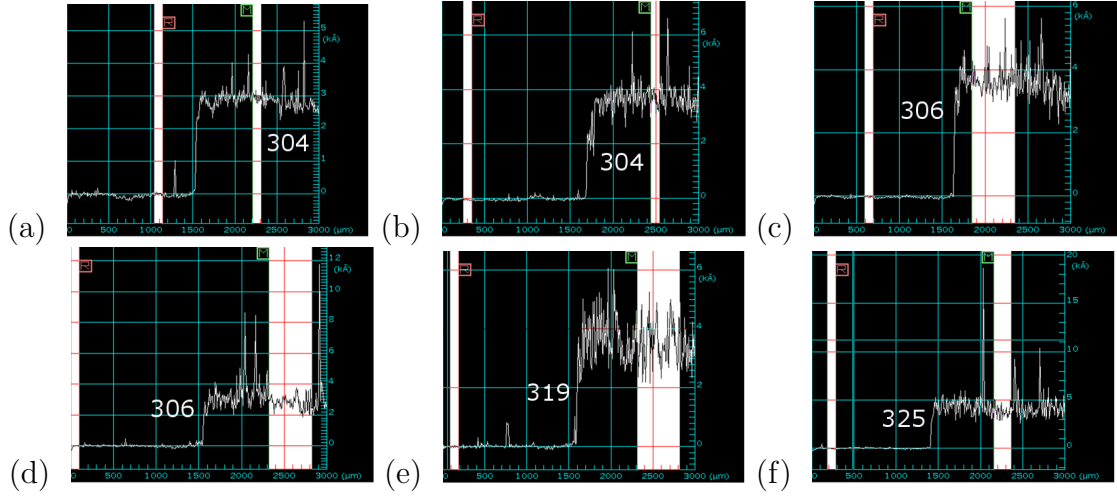

Fig. S4: Profilometry of  $(\text{TBA})_n\text{MA}_{1-n}\text{PbX}_3$  perovskite films deposited on a compact layer of  $\text{TiO}_2$  with (a)  $n=0$  (0%), (b)  $n=0.01$  (1%), (c)  $n=0.03$  (3%), (d)  $n=0.5$  (5%), (e)  $n=0.1$  (10%), (f)  $n=0.3$  (30%). The values are calculated by taking the difference between the mean values of the bands R and M respectively

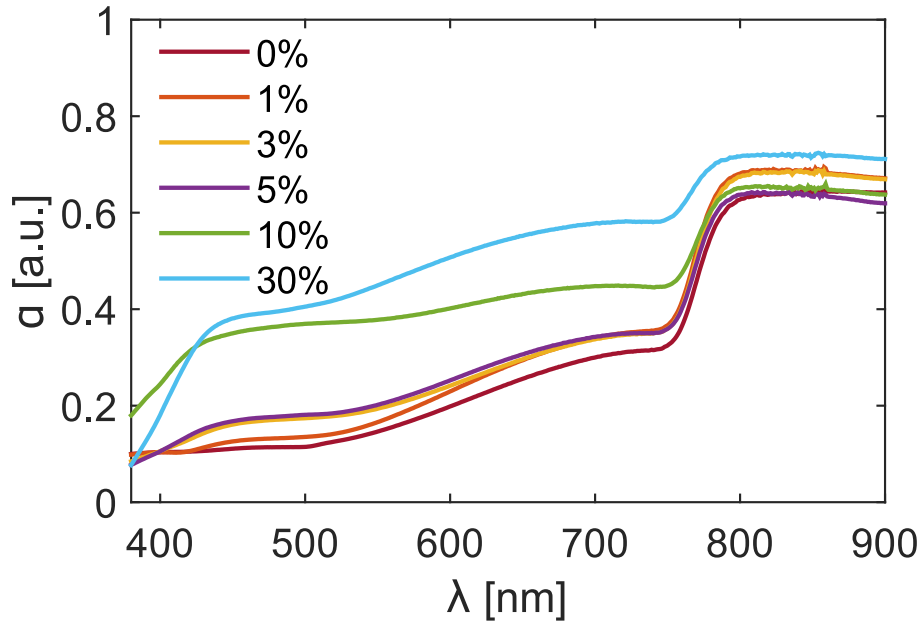

Fig. S5: Transmittance spectra of perovskite films with different concentrations of TBA in the precursor solution

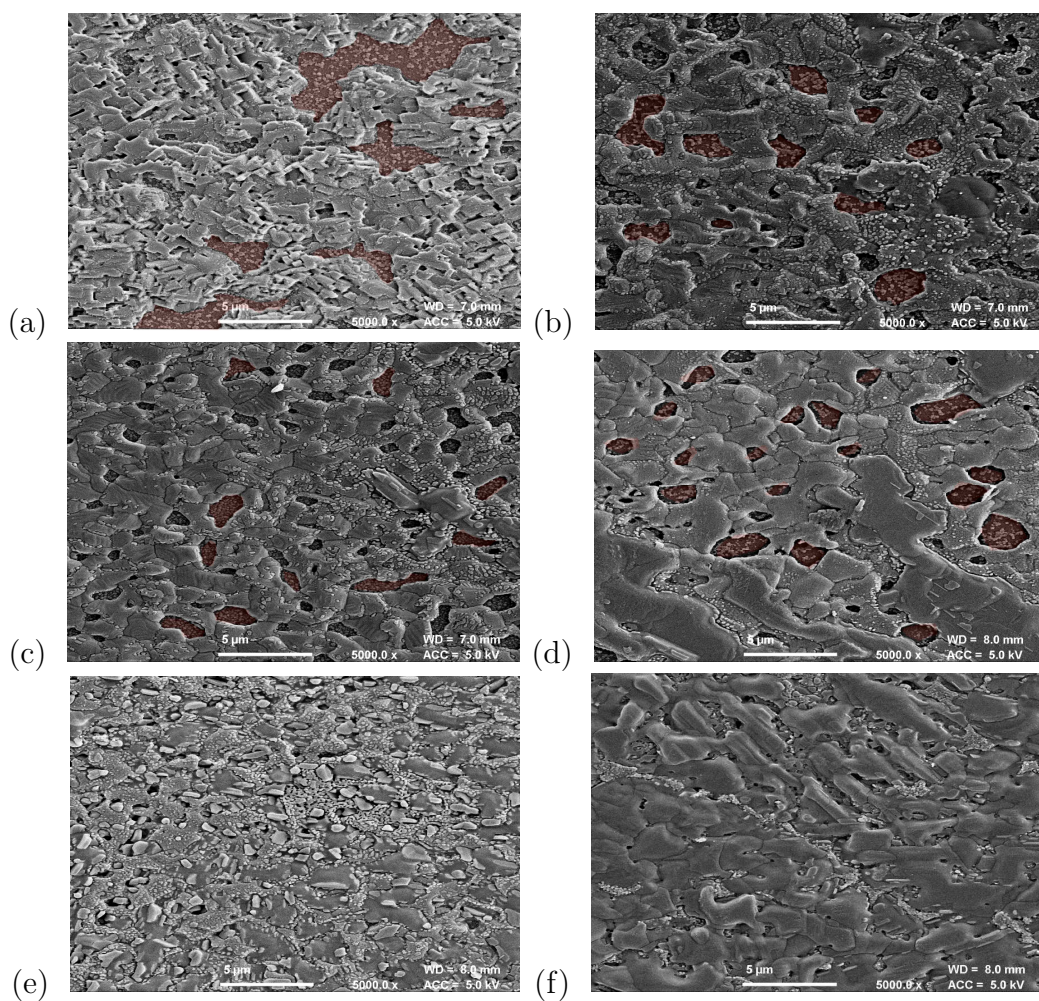

Fig. S6: Top view SEM images of  $(\text{TBA})_n\text{MA}_{1-n}\text{PbX}_3$  perovskite films deposited on a compact layer of  $\text{TiO}_2$ . (a) 0mol%; (b) 1mol%; (c) 3mol%; (d) 5mol%; (e) 10mol%; (f) 30mol%. FTO areas have been marked in red using the software Inkscape 0.91 to emphasise the pinholes

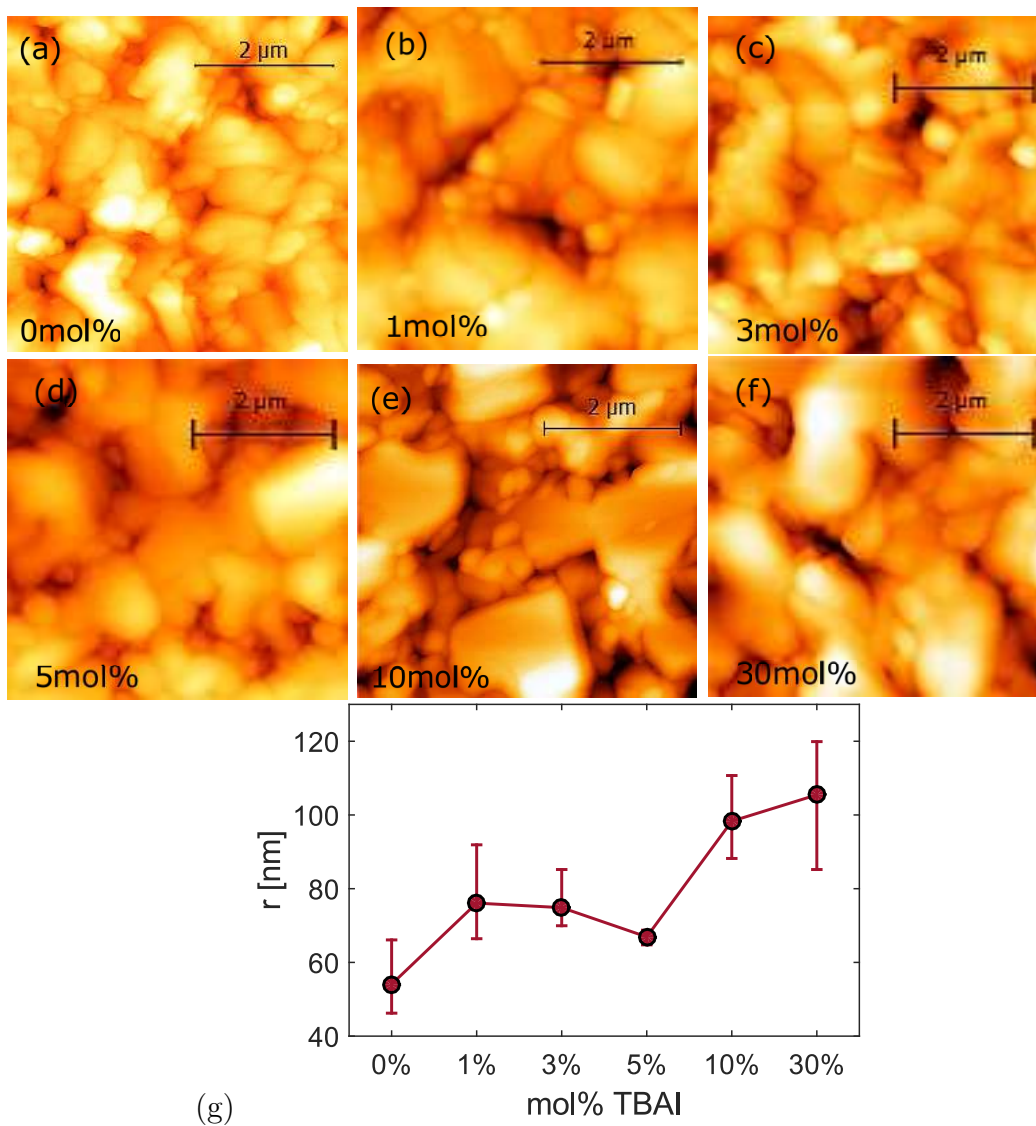

Fig. S7: (a)-(f) AFM images of  $(\text{TBA})_n(\text{MA})_{1-n}\text{PbX}_3$  perovskite films deposited on a compact layer of  $\text{TiO}_2$  with different TBA concentration; (g) Average roughness values extracted using Atomic Force Microscope as a function of TBA concentration in the perovskite precursor solution. Values were measured and averaged over  $50 \times 50 \mu\text{m}$  areas.

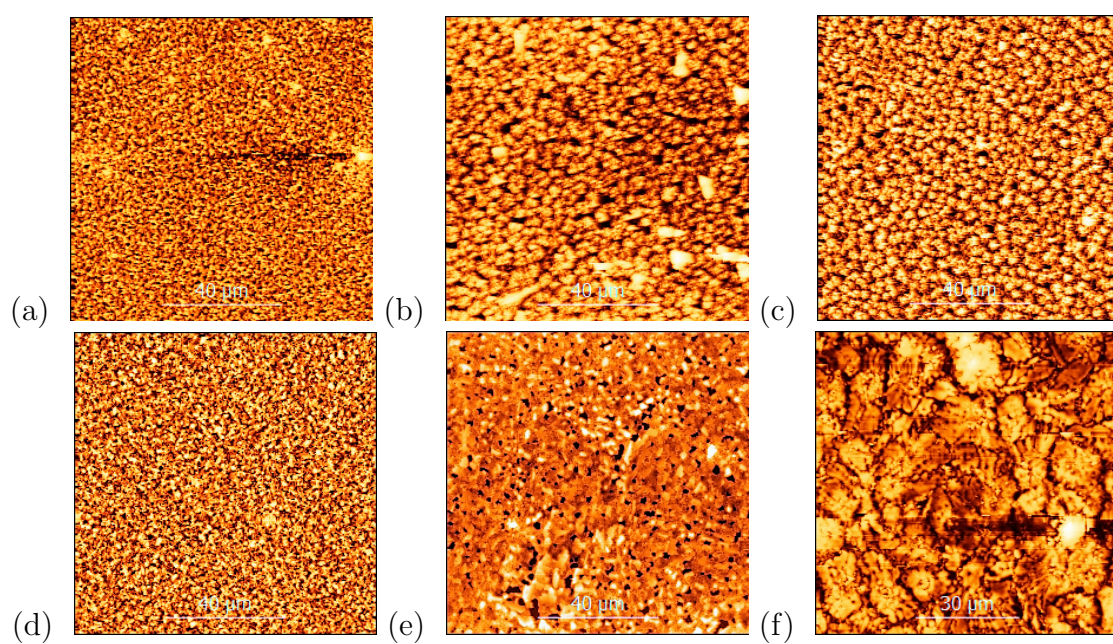

Fig. S8: AFM images of  $(\text{TBA})_n\text{MA}_{1-n}\text{PbX}_3$  perovskite films deposited on a compact layer of  $\text{TiO}_2$ ; (a) 0mol%; (b) 1mol%; (c) 3mol%; (d) 5mol%; (e) 10mol%; (f) 30mol%

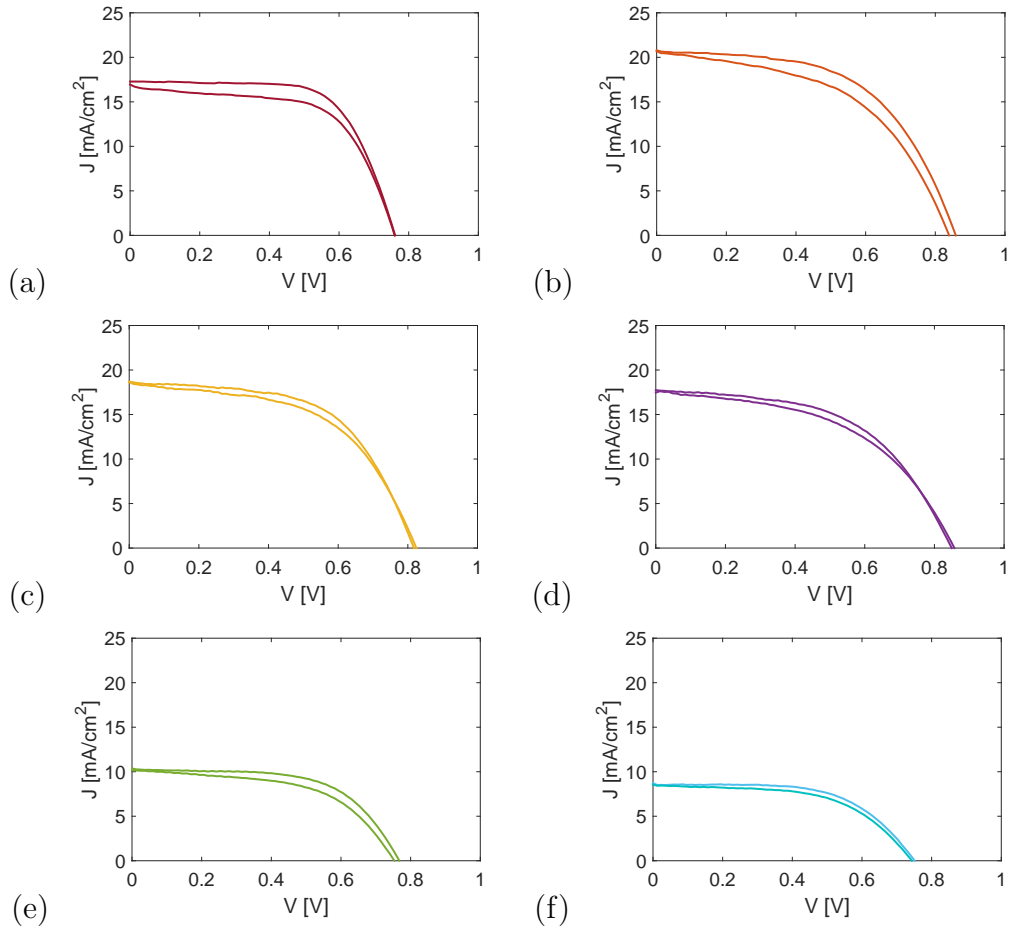

Fig. S9: JV curves in forward and reverse scan of perovskite solar cells made of  $(\text{TBA})_n\text{MA}_{1-n}\text{PbX}_3$  with (a) $n=0$ ; (b) $n=0.01$ ; (c) $n=0.03$ ; (d) $n=0.05$ ; (e) $n=0.1$ ; (f) $n=0.3$

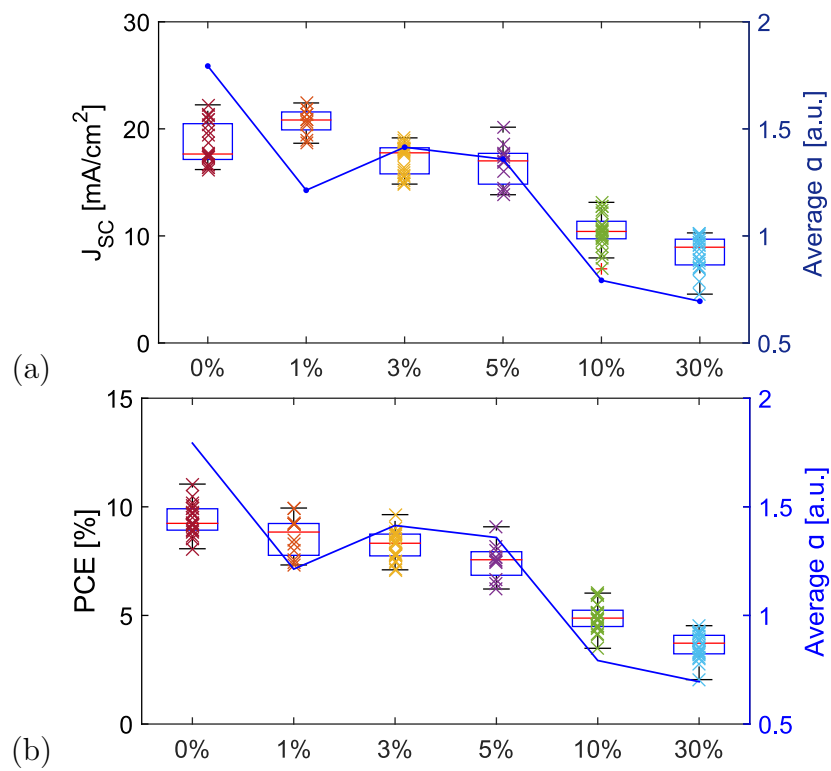

Fig. S10: Trend of photocurrent and PCEs of devices as a function of TBA concentration in the solution precursor. Data are compared to the reduction of absorption measured with UV-Vis. The absorption coefficient has been averaged between 450 and 750 nm.



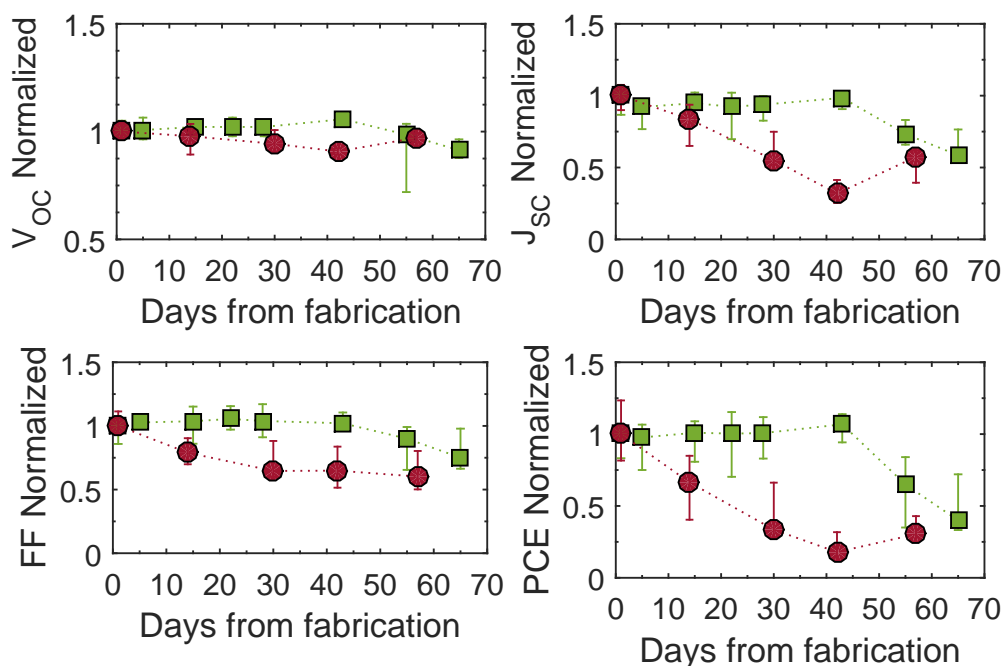

Fig. S11: Evolution of the main photovoltaic parameters over time. All the values have been normalised with respect to the median value obtained after deposition. Square green markers indicate the film with 1mol% of TBA, while red markers indicate the reference solar cell without TBA added. Cells with similar initial PCE have been considered (7.13% and 7.36% for MAPI and MAI/TBAI based cells respectively)

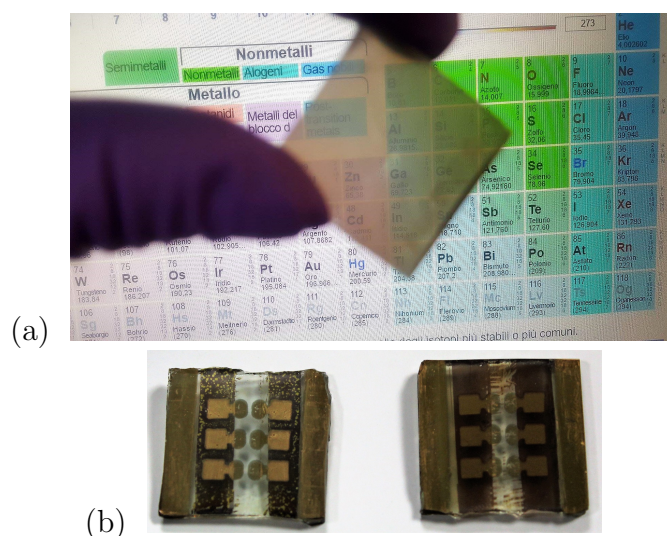

Fig. S12: (a) Image to show the semitransparent film with 30% TBA added into the solution (b) Image to show the degradation in air after over 100 days in ambient condition of films without (left) and with(right) TBA
